# Supplementary material for: The Role of Muscle Perfusion in the Age-Associated Decline of Mitochondrial Function in Healthy Individuals
Source: Front Physiol. 2019 Apr 12;10:427. doi: 10.3389/fphys.2019.00427 (PMC6473080; doi:10.3389/fphys.2019.00427)
Supplement: Supplementary file 1 [file Data_Sheet_1.CSV]

idno	visit	Age	sex	race	Height	Weight	BMI	sysBP	diaBP	Peak_VO2	tau_PCr	PCr_depletion	mean_Beta	perfusion
GT-001	1	28.28	1	1	181.1	86.4	26.34370424	120	73	35.9	35.590859	43.91717	1.89692	0.52717036
GT-002	1	67.75	1	1	186.6	89.8	25.79010189	150	78	25.9	52.413832	53.25543	1.8778	0.532538076
GT-004	1	57.39	1	1	170.2	73.3	25.30374854	110	80	25.3	36.01544	29.35589	1.90201	0.525759591
GT-005	1	31.03	1	2	177.2	74.8	23.82177744	125	80	29.3	50.793425	43.42242	1.90743	0.524265635
GT-007	1	52.04	1	1	179.1	84.1	26.21831784	97	74	30.5	63.0617	47.98342	1.906266667	0.524585577
GT-011	1	58.57	0	1	166.4	58.5	21.12755409	110	70	27.5	51.221368	47.79116	1.894733333	0.527778755
GT-013	1	60.62	1	1	172.4	79.5	26.74807952	107	77	25.1	40.0867	58.53808	1.956513333	0.511113307
GT-014	1	72.39	1	1	190.8	96.3	26.45267197	156	86	19.4	54.888962	47.81622	1.909466667	0.523706445
GT-015	1	51.47	1	1	174.4	91.7	30.14924038	131	80	30.4	34.1794	45.62477	1.91126	0.523215052
GT-016	1	38.12	0	1	170.8	71.9	24.64638099	102	63	30.5	32.5062593	12.85403	1.894666667	0.527797326
GT-017	1	45.54	1	2	188.3	83.9	23.6625378	137	91	30.6	39.5347494	46.24374	1.925120883	0.5194479
GT-018	1	73.04	0	1	157.1	73.3	29.69966868	118	81.5	16.5	46.437454	28.08511	1.908806667	0.523887525
GT-020	1	26.56	1	2	170.4	62.1	21.38712557	116	74	32.7	47.217366	25.05225	1.965446667	0.508790199
GT-022	1	23.61	1	1	181	68.4	20.87848356	101	70	47.6	35.4411477	22.89562	1.864066667	0.5364615
GT-024	1	42.87	1	2	198.3	94.6	24.05723486	128	85	28.8	32.5668112	29.59296	1.742966667	0.573734437
GT-025	1	31.92	1	2	188.9	98	27.46389689	119	84	29.5	33.161869	35.93403	1.880746667	0.53170372
GT-026	1	83.12	1	1	169.7	78.5	27.25875223	113	74	24.3	36.2644498	32.80483	1.888826667	0.529429205
GT-027	1	52.16	0	1	159.1	59.1	23.34786221	108	72	27.6	40.7616428	38.29114	1.795753333	0.556869355
GT-029	1	81.24	1	1	182.1	92.2	27.80424006	123	80	23.5	45.733381	43.71405	1.83832	0.543974934
GT-030	1	45.23	1	2	175.5	94.5	30.68156914	110	73	32.8	53.999134	27.76204	1.855986667	0.538796974
GT-032	1	80.94	0	1	168.4	55.6	19.60607309	132	76	27.4	31.899545	47.86151	1.886766667	0.530007243
GT-033	1	65.54	0	1	161.1666667	73.3	28.21977373	125	80	20.2	62.034781	25.94318	1.92424	0.519685694
GT-035	1	78.03	0	1	163.8	68.9	25.67978758	131	63	22.9	58.77225	36.85419	1.867466667	0.535484792
GT-039	1	67.98	1	2	179.3	80.2	24.94673933	102	72	32.4	58.049977	57.79743	1.8811	0.531603849
GT-042	1	33.01	1	1	171	88	30.09473	116	76	44.1	32.098708	46.67131	1.85748	0.538363805
GT-045	1	26.74	0	1	156.7	71.1	28.95553594	117	69	26.8	39.654992	40.24927	1.850046667	0.540526906
GT-046	1	25.32	1	1	170.9	80.7	27.63054233	124	85	35.3	45.385558	61.12886	1.855393333	0.538969275
GT-051	1	26.94	0	1	180.7	71.2	21.80538146	108	76	37.2	34.919669	33.69236	1.8394	0.54365554
GT-055	1	27.78	0	1	166.1	79.2	28.7068749	111	73	25.7	31.23723	34.55497	1.8835	0.530926467
GT-056	1	52.18	1	1	186.4	91.5	26.33475474	127	93	30.5	70.061578	42.36815	1.86544	0.536066558
GT-059	1	42.16	0	1	167.64	72.5747792	25.82441064	97	76.5	35.2	42.140641	31.92749	1.787553333	0.559423868
GT-060	1	47.65	1	2	173.1	85.9	28.66810775	121	80	25.6	50.2077218	46.72702	1.783113333	0.560816849
GT-061	1	70.55	1	1	176.7	89.6	28.69689513	115	66	25.2	38.1389	48.22547	1.91112	0.52325338
GT-063	1	52.62	0	2	168.1	77.2	27.32007413	121	86	26.6	58.010748	55.44755	1.9197	0.520914726
GT-064	1	37.51	1	2	180.34	75.74992579	23.29153339	128	98	23.5	38.7185029	39.03374	1.9178	0.521430806
GT-065	1	72.74	1	1	166.9	69.9	25.09368849	129	70	22.8	54.071347	51.6505	1.928953333	0.518415859
GT-071	1	72.56	0	1	160.02	51.25593781	20.01684618	130	74	23.1	59.361135	36.11961	1.86332	0.53667647
GT-073	1	22.58	1	1	177.1	75.3	24.00810345	111	74	36.7	54.9813058	54.14201	1.864046667	0.536467256
GT-078	1	47.11	0	1	172.1	85.8	28.96846927	106	70	24.7	61.0037731	49.64349	1.951293333	0.512480611
GT-080	1	67.15	0	1	167.6	83.4	29.69053491	111	69	20.6	39.0156873	52.42537	1.822833333	0.548596507
GT-083	1	80.28	0	1	157	62.6	25.39656781	128	66	15.4	78.835534	32.71028	1.916366667	0.521820807
GT-084	1	72.31	1	1	170.5	78.9	27.14114946	120	61	25.8	51.78996	50.68206	1.949366667	0.512987124
GT-085	1	25.91	0	1	153.5	58.4	24.78540886	117	69	30.4	52.9854	39.68872	1.851973333	0.539964578
GT-089	1	70.3	0	1	162.8	61.6	23.24191513	109	77	22	43.4497	50.2222	1.917493333	0.521514199
GT-090	1	31.87	0	1	158.3	65.7	26.21824031	112	76	27.4	52.1346869	34.17422	1.839733333	0.543557037
GT-092	1	63.14	1	1	168.8	72	25.26897419	119	76	32.4	33.84714	54.95886	1.794595549	0.557228619
GT-093	1	38.46	1	1	173.4	81.5	27.1056248	121	70	38	37.4547738	51.66375	1.890946667	0.528835645
GT-095	1	69.54	0	1	164	61.7	22.94021416	115	73	23.6	54.56323	36.89115	1.874986667	0.533337126
GT-098	1	76.71	1	1	176	71.8	23.17923554	124	61	33	57.0261179	58.21326	1.87978	0.531977146
GT-101	1	63.85	0	1	166.624	61.14425148	22.02320497	149	80	27.8	19.9580303	29.83051	1.783786667	0.560605154
GT-102	1	61.1	0	1	169.2	79.4	27.73446451	153	76	22.1	63.97169	52.06612	1.893646667	0.52808162
GT-104	1	35.98	1	1	173.3	78.1	26.00482338	122	75	35.7	38.07221	39.66915	1.784026667	0.560529738
GT-108	1	81.88	1	1	179.9	69	21.31997858	115	73	32.6	47.05325	49.94355	1.9357	0.516608979
GT-111	1	86.5	1	1	166.624	60.1	21.64708189	120	77	20.2	70.67007	50.37221	1.968186667	0.508081889
GT-113	1	77.2	0	1	161.6	68.1	26.07740663	114	73	24.5	39.28669	52.73478	1.89078	0.52888226
GT-114	1	72.97	1	1	176.2	82.1	26.44425577	111	74	23.5	45.47134	43.63992	1.87774	0.532555093
GT-115	1	76.13	1	1	180.4	89.6	27.53182138	116	65	27.6	49.80382	46.25551	1.9199	0.520860461
GT-119	1	31.45	1	1	175.1	82.5	26.90801471	111	84	32.3	40.02097	49.23858	1.877613886	0.532590863
GT-122	1	30.61	1	1	177.1	78.8	25.12401796	110	77	26.4	56.2597	45.77007	1.884037693	0.530774943
GT-123	1	28.61	1	1	184.4	94.6	27.82078006	110	66	31.2	41.39996	60.76168	1.827515028	0.547191123
GT-125	1	85.96	1	1	169.418	74.11699326	25.82252412	116	75	21.1	48.53401	52.87465	1.842573955	0.542719057
GT-126	1	39.75	1	1	183.134	93.30395051	27.8203167	108	67	26.5	47.9694	41.06218	1.863447572	0.536639729
GT-128	1	49.68	1	1	182.118	89.99272621	27.13324047	129	84	36.6	32.71264	46.31118	1.875443301	0.533207269
GT-129	1	34.68	1	1	177.2	69.4	22.10202345	101	65	41.7	23.13187	33.02991	1.796055845	0.556775561
GT-130	1	31.45	1	1	181.2	84.9	25.85778402	124	79	34.2	43.6031	34.67686	1.829134983	0.546706508
GT-131	1	29.3	0	1	161	62.5	24.11172408	109	63	25.3	56.75499	54.91143	1.859259312	0.53784859
GT-132	1	89.22108145	1	1	169.672	78.01788764	27.1002832	137	59	27.5	55.95785	56.36716	1.819307925	0.549659564
GT-133	1	48.22997947	0	1	166.5	73.4	26.47692738	124	88	32	26.37044	45.52929	1.789889147	0.558693817
GT-135	1	29.92197125	1	1	178.4	85	26.70725331	102	76	39	57.96135	39.74359	1.789889147	0.558693817
GT-136	1	55.9835729	1	1	180	82.9	25.58641975	128	86	19.4	52.31934	44.60308	1.873419303	0.533783333
GT-137	1	28.56947296	0	1	165	61.3	22.51606979	103	71	27.9	34.34633	33.50142	1.769646073	0.565084745
GT-138	1	71.24982888	0	1	159.6	69.3	27.20617333	119	68	22.2	60.81115	55.1644	1.903937224	0.525227401
GT-141	1	35.65229295	0	1	159.3	56.4	22.22529593	110	67	28.5	46.2154	40.28986	1.813250666	0.55149573
GT-142	1	27.68240931	1	1	191	105.6	28.94657493	121	66	36.3	30.22765	32.27879	1.73922714	0.574968029
GT-144	1	32.25462012	0	1	168.1	71.7	25.37369579	100	70	38.7	26.19196	27.87944	1.82175341	0.548921712
